# Supplementary material for: Water isotopes – climate relationships for the mid-Holocene and preindustrial period simulated with an isotope-enabled version of MPI-ESM
Source: Copernicus journal article supplement (doi:10.5194/cp-15-1913-2019), 2019-11-14
Supplement: Supplementary file 1 [file cp-15-1913-2019-supplement.pdf]

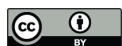

## *Supplement of*

# **Water isotopes – climate relationships for the mid-Holocene and preindustrial period simulated with an isotope-enabled version of MPI-ESM**

**Alexandre Cauquoin et al.**

*Correspondence to:* Alexandre Cauquoin ([alexandre.cauquoin@awi.de](mailto:alexandre.cauquoin@awi.de))

The copyright of individual parts of the supplement might differ from the CC BY 4.0 License.

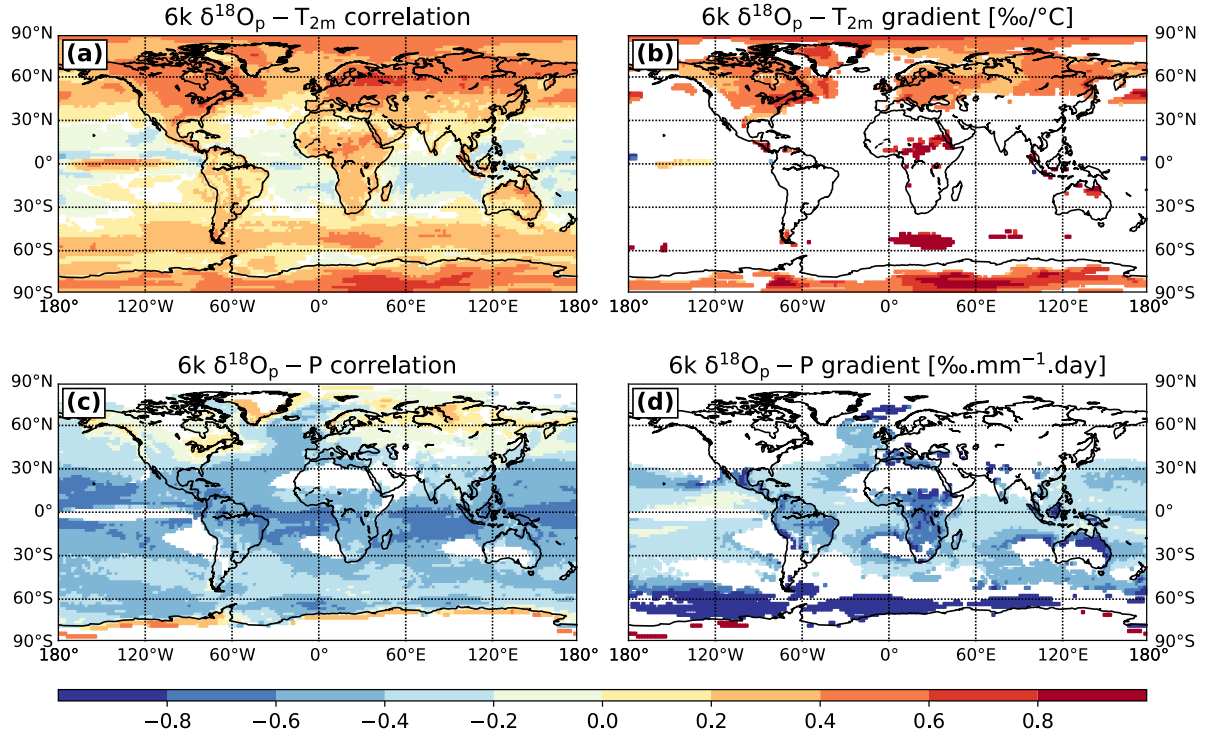

**Figure S1:** As Figure 8 but for 6k.

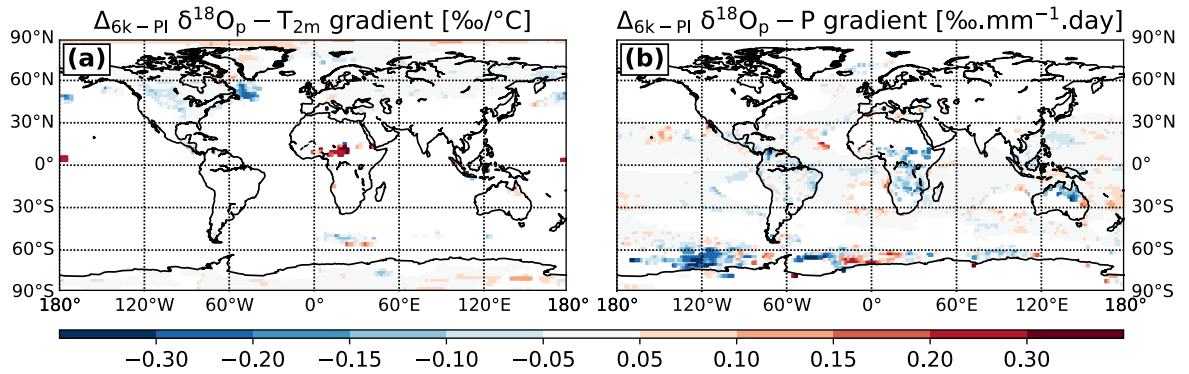

**Figure S2:** Distribution of the differences between the 6k  $\delta^{18}O_p$  – temperature gradients and the PI ones (a). The same for the  $\delta^{18}O_p$  – precipitation gradients (b).

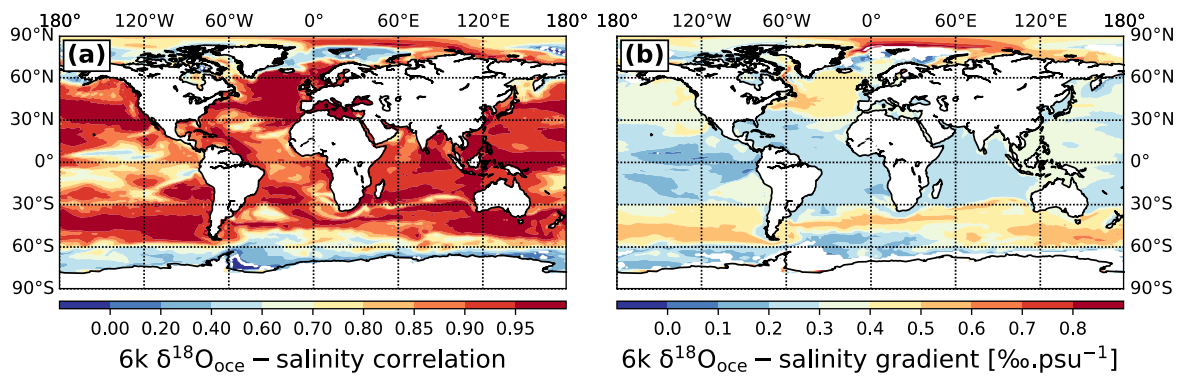

**Figure S3:** As Figure 9 but for 6k.

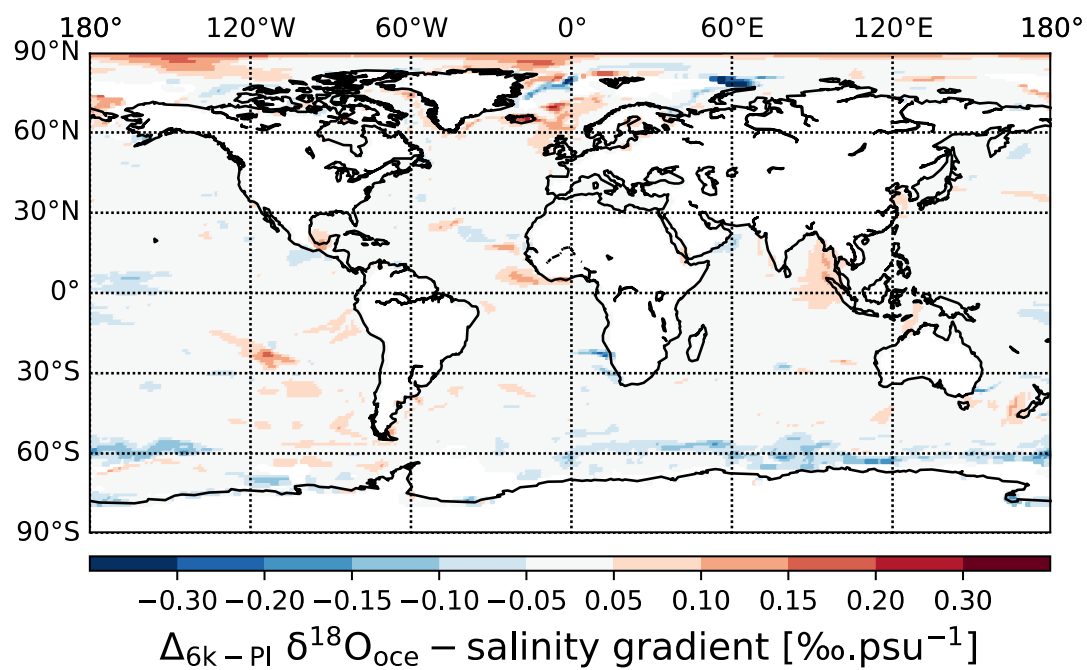

**Figure S4:** Distribution of the differences between the 6k  $\delta^{18}\text{O}_{\text{oce}}$  – salinity gradients and the PI ones.
